# Supplementary material for: Mycobacterium tuberculosis senses host Interferon-γ via the membrane protein MmpL10
Source: Springer Nature journal article supplement (doi:10.1038/s42003-022-04265-0), 2022-12-01
Supplement: MOESM1 [file 42003_2022_4265_MOESM1_ESM.pdf]

Supplementary Materials for  
*Mycobacterium tuberculosis* senses host Interferon- $\gamma$  via the membrane protein  
**MmpL10**

Mohamed Ahmed<sup>1,2</sup>, Jared Mackenzie<sup>1</sup>, Liku Tezera<sup>3,5</sup>, Robert Krause<sup>1,2</sup>, Barry Truebody<sup>1</sup>,  
Diana Garay-Baquero<sup>3</sup>, Andres Vallejo<sup>3</sup>, Katya Govender<sup>1,2</sup>, John Adamson<sup>1</sup>, Hayden Fisher<sup>7,8,9</sup>,  
Jonathan W. Essex<sup>4,9</sup>, Salah Mansour<sup>3,4</sup>, Paul Elkington<sup>3,4</sup>, Adrie JC Steyn<sup>1,6</sup>, Alasdair Leslie<sup>1,2,5\*</sup>

\*Correspondence to: [al.leslie@ahri.org](mailto:al.leslie@ahri.org)

**This PDF file includes:**

Figs. S1 to S7  
Tables S1 to S3

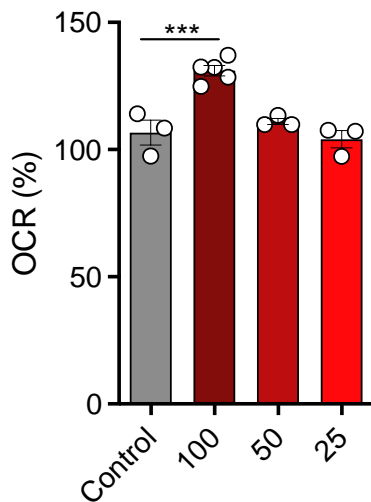

**Fig. S1. Murine recombinant IFN- $\gamma$  increases *Mtb* OCR.**

The mouse is the most used animal model used for investigations into basic immunology during *Mtb* infection. Addition of recombinant murine IFN- $\gamma$  to *Mtb* at indicated concentrations (ng/mL) induces dose-dependent increase in OCR similar to the effect seen with human IFN- $\gamma$ . Data are shown as mean  $\pm$  SEM of n=3-5 technical replicates and represent at a minimum two independent experiments. Tukey's correction multiple-comparison test was used for the statistical analysis.

\*\*\*p<0.001.

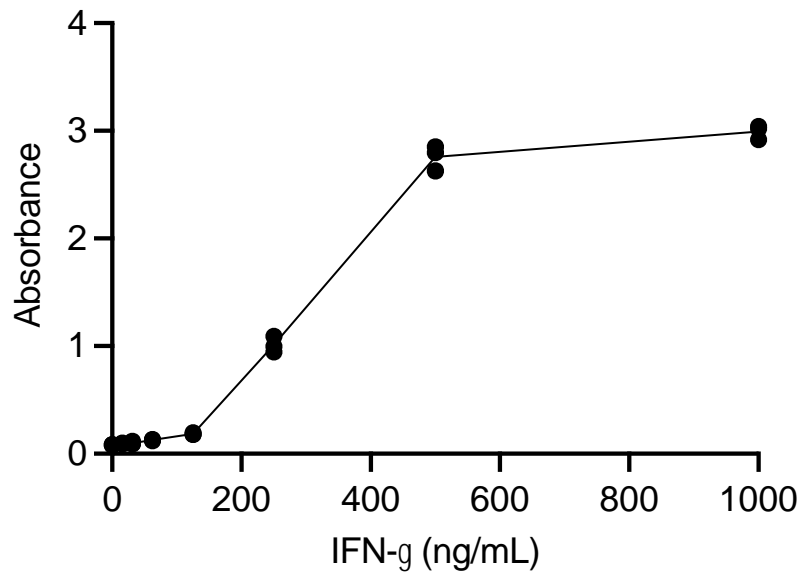

**Fig. S2. Binding of IFN- $\gamma$  to *Mtb*.**

IFN- $\gamma$  binds to formalin-fixed *Mtb* in a dose-dependent manner at indicated concentrations (ng/mL) as measured by ELISA. This assay complements the binding observed by flow cytometry and confocal microscopy. Data are shown as mean  $\pm$  SEM of n=3 technical replicates and represent at a minimum two independent experiments.

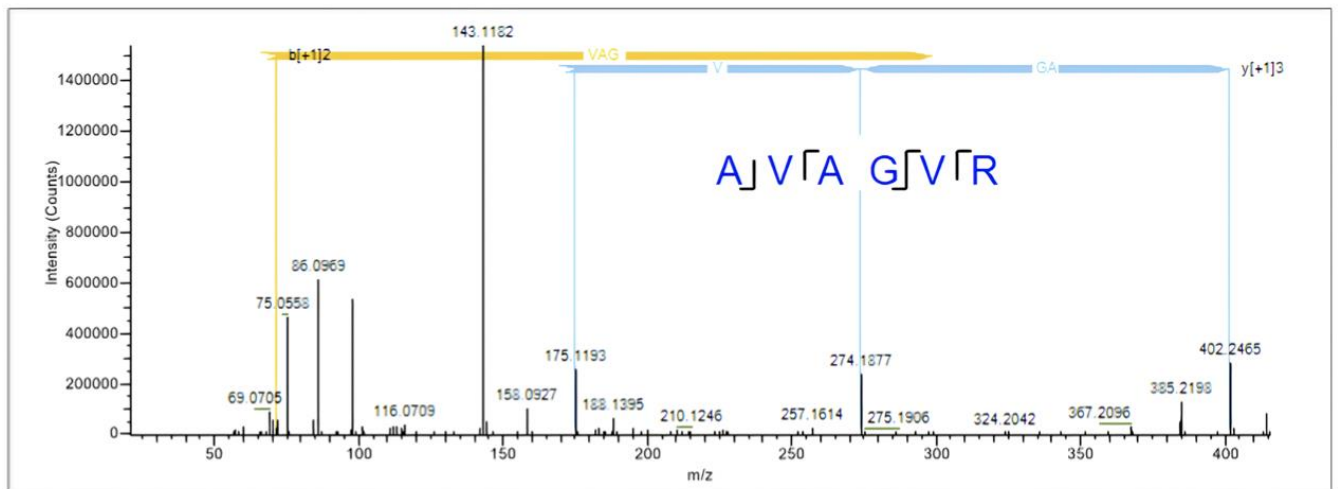

**Fig. S3. Ionic spectrum of unique MmpL10 fragment obtained by HCD fragmentation.**

Unique fragment spectrum to *Mtb* MmpL10 obtained by higher energy collisional dissociation fragmentation.

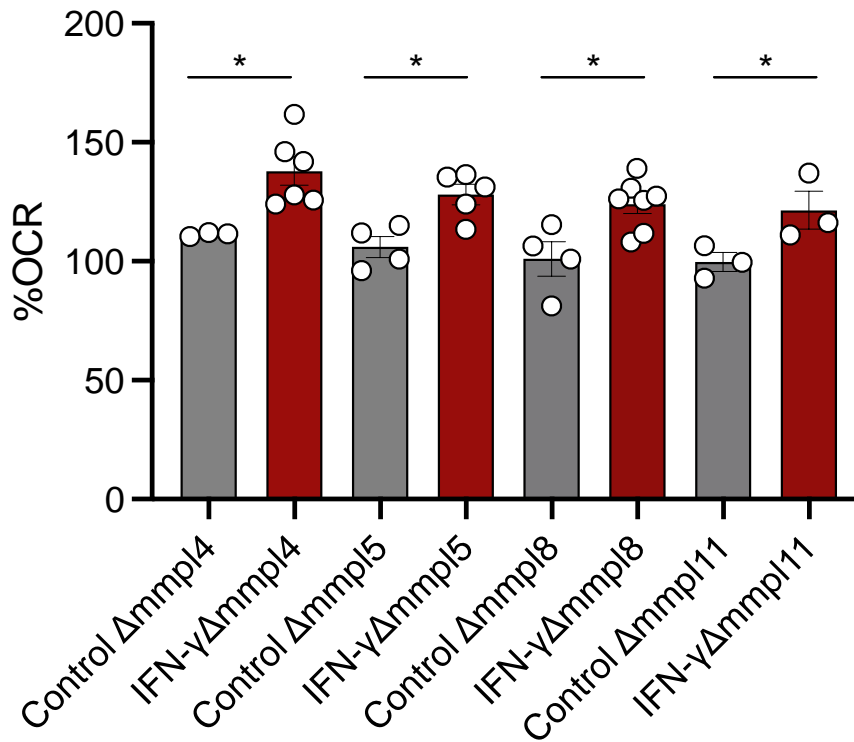

Fig. S4. **IFN- $\gamma$  increases OCR in several *Mtb*  $\Delta mmps$ .**

Human recombinant IFN- $\gamma$  increases OCR in several *Mtb*  $\Delta mmps$  to confirm this effect is mediated by MmpL10. Data are shown as mean  $\pm$  SEM of n=3-6 technical replicates and represent at a minimum two independent experiments. Tukey's correction multiple-comparison test was used for the statistical analysis. \*p<0.05.

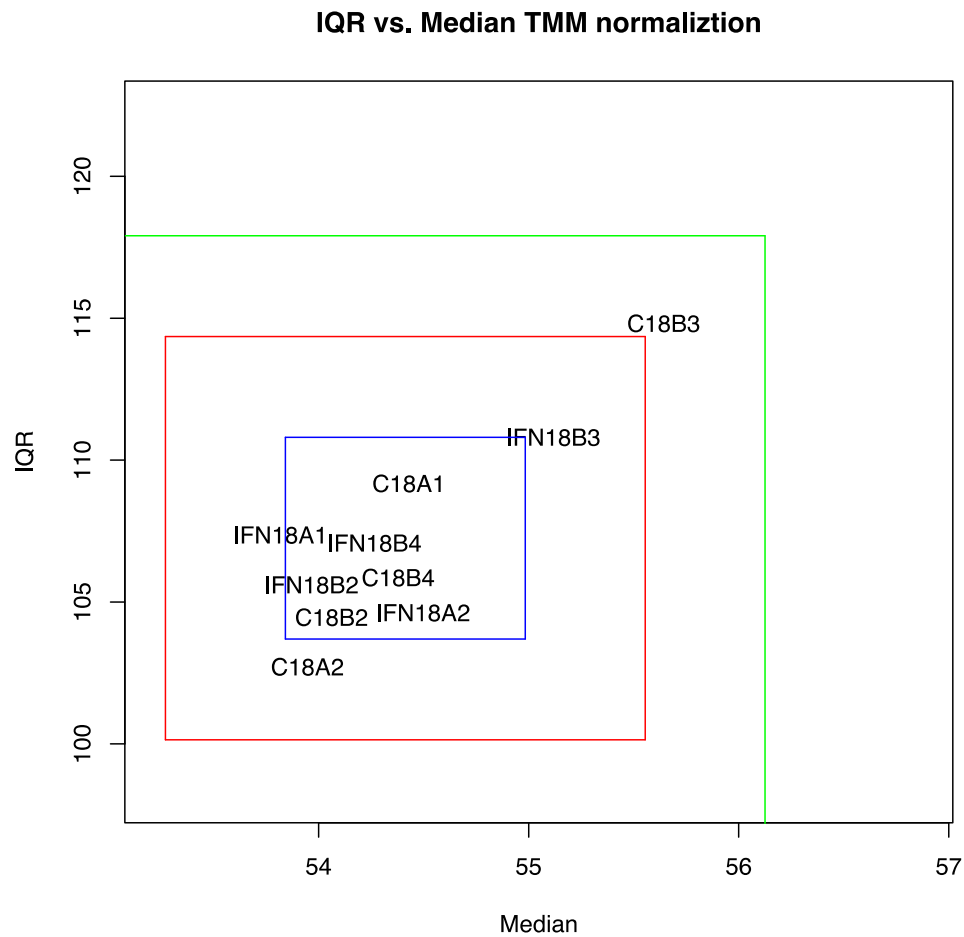

**Fig. S5. Interquartile range analysis of RNA sequencing.**

Control samples denoted with C; IFN- $\gamma$ -treated samples denoted by IFN. Five replicates per condition. Blue square indicates 1SD, red square 2SD and green square 3SD.

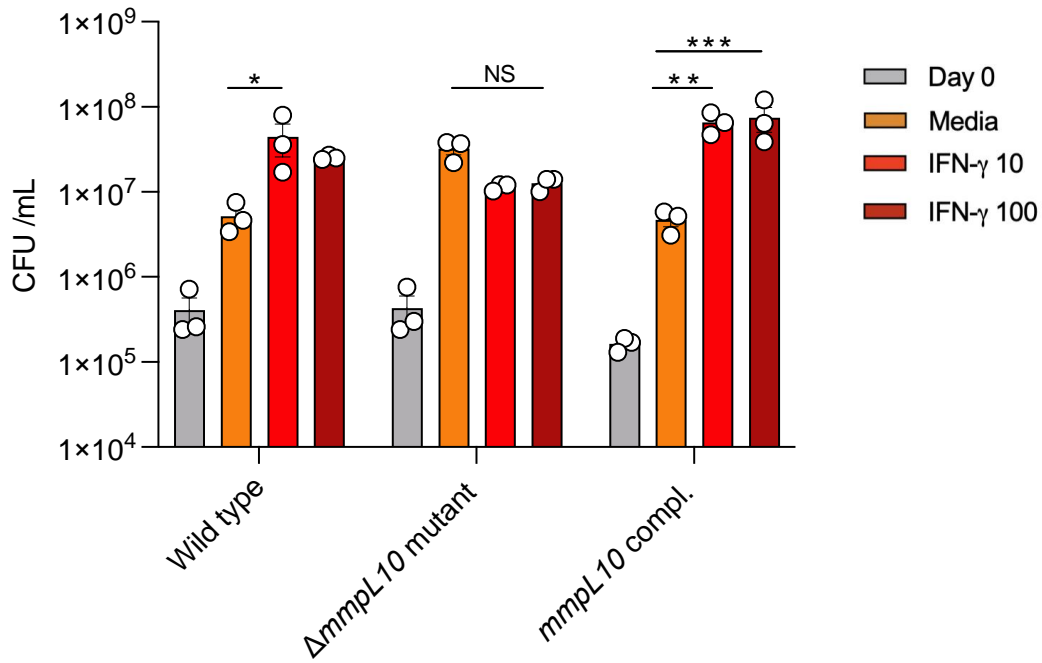

**Fig. S6. Effect of IFN-γ on *Mtb* burden is mediated by MmpL10.**

The role of MmpL10 in IFN-γ-driven *Mtb* infection is investigated by comparing growth of wild-type,  $\Delta mmpL10$  mutant and *mmpL10*-complement. At day 15, IFN-γ supplementation (ng/mL) of the culture media resulted in a statistically significant increased CFU count of *Mtb* wild type but not  $\Delta mmpL10$  mutant. The effect was restored in the *mmpL10*-complement with a higher increase in CFU count compared to wild-type. Data are presented as mean  $\pm$  SEM of n=3-5 technical replicates and are representative of two experiments done in triplicates. Dunnett's multiple comparison test was used for the statistical analysis. \*p<0.05, \*\*p<0.01, \*\*\*p<0.001.



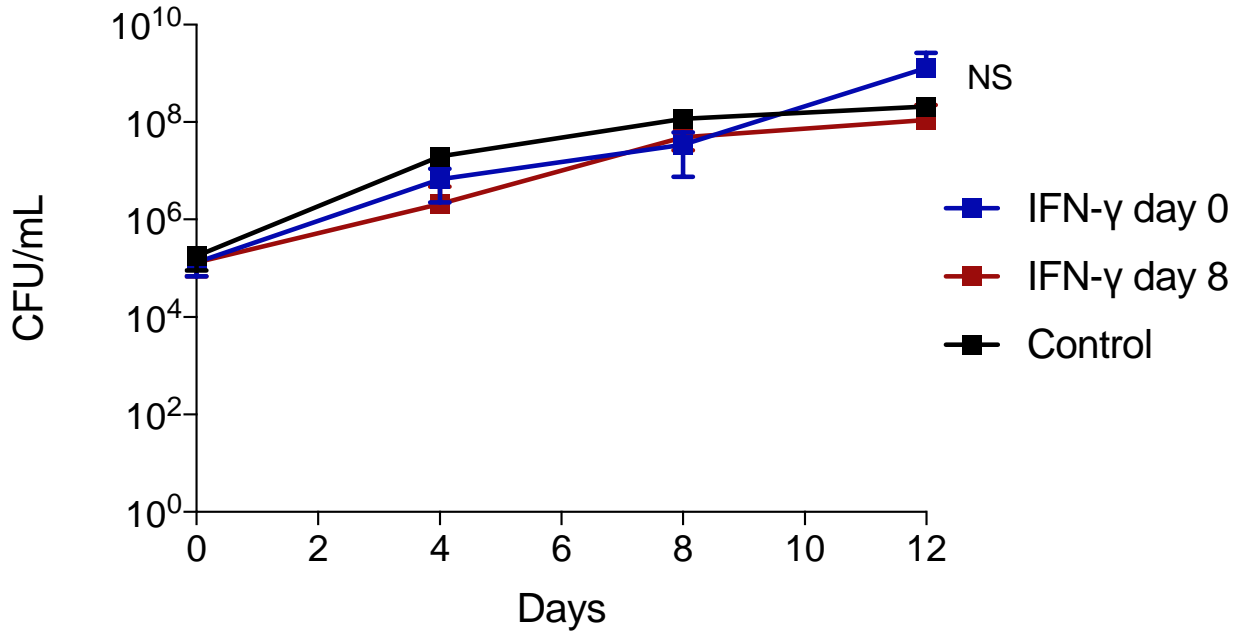

Fig. S7. **IFN- $\gamma$  does not enhance growth of *Mtb* cultures.**

In contrast to infection of PBMCs, addition of human recombinant IFN- $\gamma$  to *Mtb* in broth only does not increase bacterial growth. No significant differences in CFU count were observed between after IFN- $\gamma$  supplementation (100 ng/mL) on day 12. Cytokine was added on day 0 or day 8. Data are presented as mean  $\pm$  SEM of n=3 technical replicates and are representative of two independent experiments in triplicates. Dunnett's multiple comparison test was used for the statistical analysis. ns = not significant.

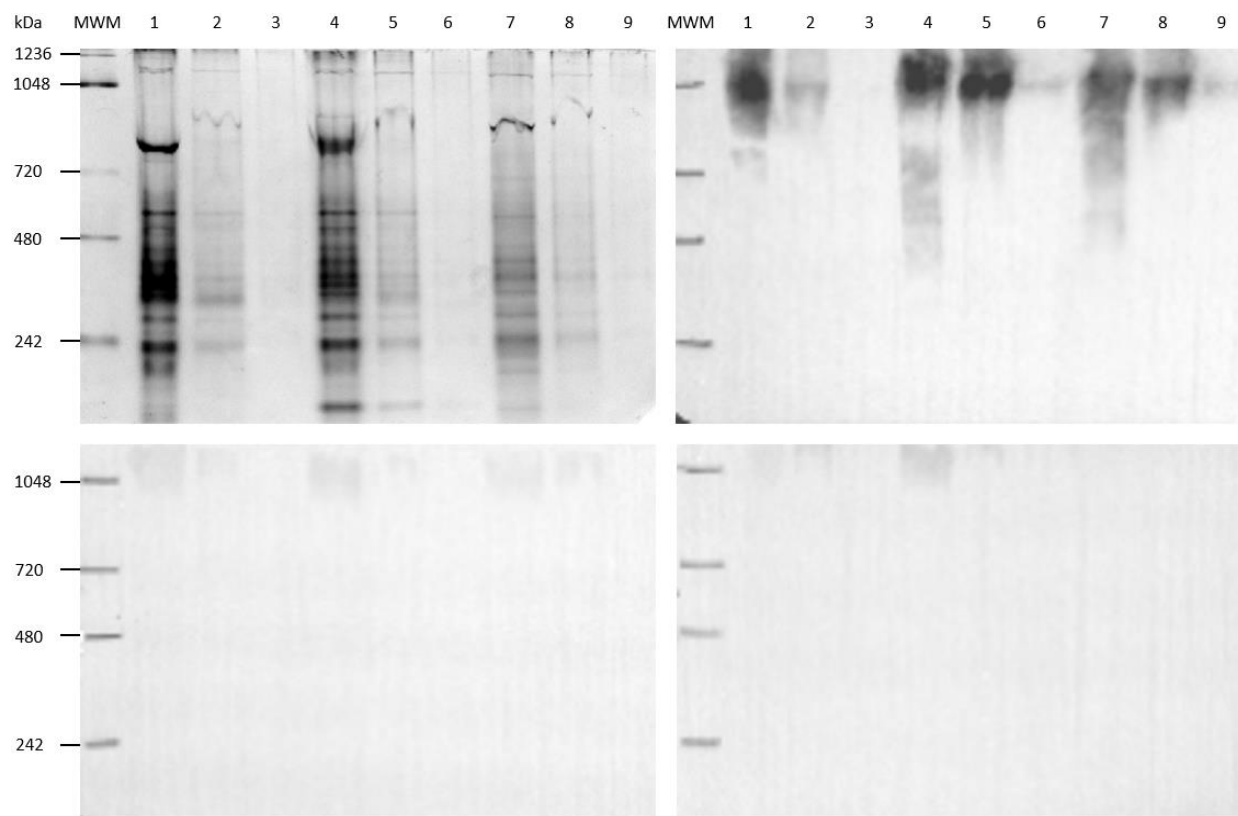

**Fig. S8. Uncropped images of gel and blots.**

Upper left-hand panel: 7.5% native polyacrylamide gel stained with Coomassie Blue. Upper right-hand panel: Blot incubated with IFN- $\gamma$  and anti-IFN- $\gamma$  antibody. Bottom left-hand panel: Control blot incubated with IFN- $\gamma$  without anti-IFN- $\gamma$  antibody. Bottom right-hand panel: Control blot incubated without IFN- $\gamma$  and with anti-IFN- $\gamma$  antibody. Lanes 1-3 contain lysate of wildtype *Mtb*. Lanes 4-6 contain lysate of  $\Delta mmpL10$  mutant. Lanes 7-9 contain lysate of BCG. Amount of protein loaded 25  $\mu$ g, 5  $\mu$ g and 1  $\mu$ g per lysate starting at the highest amount. MWM: molecular weight marker. kDa: kilodalton.

| Accession | Description                                                                                                                     | Coverage [%] | # Peptides | # PSMs | # Unique Pepts | # Protein Group | # AAs | MW [kDa] | calc. pI | Score | Sequest HT | Sequest HT |
|-----------|---------------------------------------------------------------------------------------------------------------------------------|--------------|------------|--------|----------------|-----------------|-------|----------|----------|-------|------------|------------|
| P9WPE7    | 60 kDa chaperonin 2 OS=Mycobacterium tuberculosis (strain ATCC 25618 / H37Rv) OX=83332 GN=groEL2 PE=1 SV=1                      | 18           | 6          | 6      | 6              | 1               | 540   | 56.7     | 4.92     | 2.62  |            |            |
| P96A00    | Probable conserved transmembrane protein OS=Mycobacterium tuberculosis (strain ATCC 25618 / H37Rv) OX=83332 GN=Rv0218 PE=4 SV=1 | 2            | 1          | 1      | 1              | 1               | 442   | 47.3     | 10.08    | 0.00  |            |            |
| P9WJL1    | Acyltrehalose exporter MmpL10 OS=Mycobacterium tuberculosis (strain ATCC 25618 / H37Rv) OX=83332 GN=mmpL10 PE=1 SV=1            | 1            | 1          | 4      | 1              | 1               | 1002  | 106.3    | 8.65     | 0.00  |            |            |
| Q05790    | Possible phosphatase OS=Mycobacterium tuberculosis (strain ATCC 25618 / H37Rv) OX=83332 GN=Rv3113 PE=4 SV=1                     | 8            | 1          | 1      | 1              | 1               | 222   | 24.8     | 5.67     | 0.00  |            |            |
| RYVY2     | Uncharacterized protein OS=Mycobacterium tuberculosis (strain ATCC 25618 / H37Rv) OX=83332 GN=Rv0804 PE=1 SV=1                  | 14           | 1          | 1      | 1              | 1               | 209   | 21.6     | 12.10    | 0.00  |            |            |
| P9WHR3    | Carboxylesterase A OS=Mycobacterium tuberculosis (strain ATCC 25618 / H37Rv) OX=83332 GN=caeA PE=1 SV=1                         | 6            | 1          | 1      | 1              | 1               | 520   | 55.9     | 6.19     | 0.00  |            |            |
| P9WKH1    | [2E,6E]-farnesyl diphosphate synthase OS=Mycobacterium tuberculosis (strain ATCC 25618 / H37Rv) OX=83332 GN=Rv3398c PE=1 SV=1   | 12           | 1          | 1      | 1              | 1               | 359   | 38.8     | 6.32     | 0.00  |            |            |
| P9WFO3    | Nucleotide-binding protein Rv1421 OS=Mycobacterium tuberculosis (strain ATCC 25618 / H37Rv) OX=83332 GN=Rv1421 PE=1 SV=1        | 2            | 1          | 1      | 1              | 1               | 301   | 32.9     | 6.98     | 0.00  |            |            |
| I6K666    | Uncharacterized protein OS=Mycobacterium tuberculosis (strain ATCC 25618 / H37Rv) OX=83332 GN=Rv3076 PE=1 SV=1                  | 5            | 1          | 2      | 1              | 1               | 158   | 17.1     | 9.95     | 0.00  |            |            |
| P9WN45    | 1,4-alpha-glucan branching enzyme GlgB OS=Mycobacterium tuberculosis (strain ATCC 25618 / H37Rv) OX=83332 GN=glgB PE=1 SV=1     | 3            | 1          | 1      | 1              | 1               | 731   | 81.7     | 5.73     | 0.00  |            |            |

**Table S1. Proteins in immunoreactive membrane bands corresponding to peptide fragments observed by mass spectrometry.**

Shotgun mass spectrometry detected several peptides in the immunoreactive band. Only MmpL10 is a characterized membrane-associated protein.

| <u>ID</u> | <u>ORF size</u> | <u>POI</u> | <u>ORF description</u> | <u>Rv#</u> | <u>JHU_ID</u> |
|-----------|-----------------|------------|------------------------|------------|---------------|
| HG1139    | 2904            | 311        | MmpL4                  | Rv0450c    | JHU0450c-311  |
| STN1424   | 2895            | 1540       | MmpL5                  | Rv0676c    | JHU0676c-1540 |
| JO1275    | 3270            | 114        | MmpL8                  | Rv3823c    | JHU3823c-114  |
| STN0573   | 3009            | 2396       | MmpL10                 | Rv1183     | JHU1183-2396  |
| NA0234    | 2901            | 279        | MmpL11                 | Rv0202c    | JHU0202c-279  |

**Table S2. List of *Mtb*  $\Delta mmpL$ s.**

List of all *Mtb*  $\Delta mmpL$ s used in this study taken from JHU transposon mutant library.

| Gene      | C18A1     | IFN18A1   | C18A2     | IFN18A2   | C18B2     | IFN18B2   | C18B3     | IFN18B3   | C18B4     | IFN18B4   | logFC    | logCPM    | LR        | PValue   | FDR      |
|-----------|-----------|-----------|-----------|-----------|-----------|-----------|-----------|-----------|-----------|-----------|----------|-----------|-----------|----------|----------|
| Rv3561    | 2.195.142 | 198.632   | 3.008.154 | 2.551.917 | 3.000.314 | 2.501.671 | 7.962.967 | 6.115.893 | 4.266.514 | 3.819.546 | -0.24635 | 5.224.387 | 2.908.184 | 6.94E-08 | 0.000288 |
| MTB000021 | 1.504.634 | 1.773.455 | 1.203.052 | 1.337.287 | 1.167.094 | 1.271.669 | 1.003.249 | 1.316.903 | 1.780.877 | 1.932.131 | 0.203959 | 7.156.781 | 2.258.887 | 2.01E-06 | 0.002777 |
| Rv1686c   | 9.040.289 | 7.875.697 | 1.647.472 | 1.370.094 | 1.581.817 | 1.238.235 | 5.571.255 | 3.837.003 | 1.668.652 | 1.565.082 | -0.31017 | 4.340.593 | 228.777   | 1.73E-06 | 0.002777 |
| Rv1687c   | 1.151.263 | 9.963.231 | 2.442.948 | 1.856.618 | 2.312.168 | 1.774.187 | 8.532.087 | 6.234.833 | 2.457.172 | 2.583.628 | -0.28661 | 4.927.323 | 1.874.394 | 1.49E-05 | 0.015518 |
| Rv2620c   | 1.548.337 | 1.745.938 | 3.447.759 | 2.259.258 | 3.273.737 | 2.251.336 | 1.218.903 | 1.052.381 | 4.132.368 | 3.347.537 | -0.3097  | 5.484.157 | 1.595.457 | 6.49E-05 | 0.053877 |
| Rv2347c   | 1.532.075 | 171.611   | 8.478.865 | 9.440.587 | 9.055.374 | 1.011.146 | 9.184.787 | 1.196.144 | 1.593.022 | 1.654.109 | 0.182111 | 6.940.971 | 1.533.315 | 9.01E-05 | 0.062364 |
| Rv3559c   | 1.198.712 | 1.173.447 | 1.331.375 | 1.062.522 | 1.223.981 | 1.117.268 | 2.060.118 | 1.629.477 | 1.675.196 | 1.388.079 | -0.22615 | 3.789.828 | 1.472.789 | 0.000124 | 0.073666 |
| Rv0393    | 3.789.283 | 3.185.071 | 4.224.395 | 428.737   | 4.621.408 | 3.998.642 | 3.967.373 | 338.741   | 3.060.127 | 2.599.154 | -0.17556 | 5.223.238 | 1.356.322 | 0.000231 | 0.090692 |
| Rv1953    | 212.272   | 2.530.344 | 2.009.623 | 2.852.033 | 203.691   | 2.721.764 | 2.963.183 | 4.329.414 | 2.879.243 | 3.012.162 | 0.379653 | 1.470.671 | 134.866   | 0.00024  | 0.090692 |
| Rv2618    | 2.816.974 | 2.941.525 | 3.747.109 | 31.391    | 3.633.407 | 3.099.787 | 9.783.208 | 7.314.807 | 364.486   | 3.310.273 | -0.20645 | 5.443.283 | 1.371.596 | 0.000213 | 0.090692 |
| Rv3562    | 1.892.967 | 1.698.494 | 1.948.916 | 1.638.521 | 1.789.178 | 1.634.739 | 4.465.941 | 3.480.183 | 24.539    | 2.347.623 | -0.20024 | 4.543.133 | 139.859   | 0.000184 | 0.090692 |
| Rv1845c   | 1.617.263 | 1.446.724 | 1.361.938 | 1.341.201 | 1.441.802 | 1.272.509 | 1.969.341 | 1.642.799 | 1.365.023 | 1.293.987 | -0.14118 | 720.524   | 1.319.461 | 0.000281 | 0.097142 |
| Rv3341    | 5.728.846 | 5.544.617 | 6.518.714 | 5.845.736 | 6.538.298 | 5.307.441 | 1.298.392 | 9.308.241 | 6.877.464 | 6.744.758 | -0.20611 | 61.584    | 1.240.264 | 0.000429 | 0.136929 |
| Rv3190A   | 5.886.177 | 6.373.305 | 4.354.183 | 4.524.107 | 4.398.625 | 4.736.206 | 3.226.577 | 4.291.354 | 4.780.197 | 5.412.575 | 0.170057 | 5.582.173 | 1.204.067 | 0.000521 | 0.154372 |
| Rv2621c   | 1.184.478 | 1.370.182 | 2.815.147 | 2.114.978 | 282.58    | 2.013.266 | 7.503.203 | 5.438.648 | 2.675.733 | 233.427   | -0.27309 | 8.242.718 | 1.129.592 | 0.000777 | 0.215012 |

**Table S3. Extended list of differentially expressed *Mtb* genes.**

All differentially regulated genes in *Mtb* after 18 hours IFN- $\gamma$  incubation. Controls are denoted by C; IFN- $\gamma$  stimulated samples are denoted by IFN, n=5 per group.
